# Supplementary material
Source: PubMed Central journal article supplement (PMC8448956)
Supplement: NIHMS1737779-supplement-Supplementary_Material.pdf [file NIHMS1737779-supplement-Supplementary_Material.pdf]

# Supporting information : Quasi-free Electron-mediated Radiation Sensitization by C5-Halopyrimidines

*Jun Ma,<sup>a,\*</sup> Teseer Bahry,<sup>a,b</sup> Sergey A. Denisov,<sup>b</sup> Amitava Adhikary,<sup>c</sup> Mehran Mostafavi<sup>b,\*</sup>*

<sup>a</sup> *Department of Nuclear Science and Engineering, Nanjing University of Aeronautics and Astronautics,  
Nanjing 211106, P. R. China*

<sup>b</sup> *Institut de Chimie Physique, UMR 8000 CNRS, Bât. 349, Université Paris-Saclay; 91405, Orsay,  
Cedex, France*

<sup>c</sup> *Department of Chemistry, Oakland University, 146 Library Drive, Rochester, MI - 48309, United  
States*

**E-mail:** [junma@nuaa.edu.cn](mailto:junma@nuaa.edu.cn); [mostafavi@universite-paris-saclay.fr](mailto:mostafavi@universite-paris-saclay.fr)

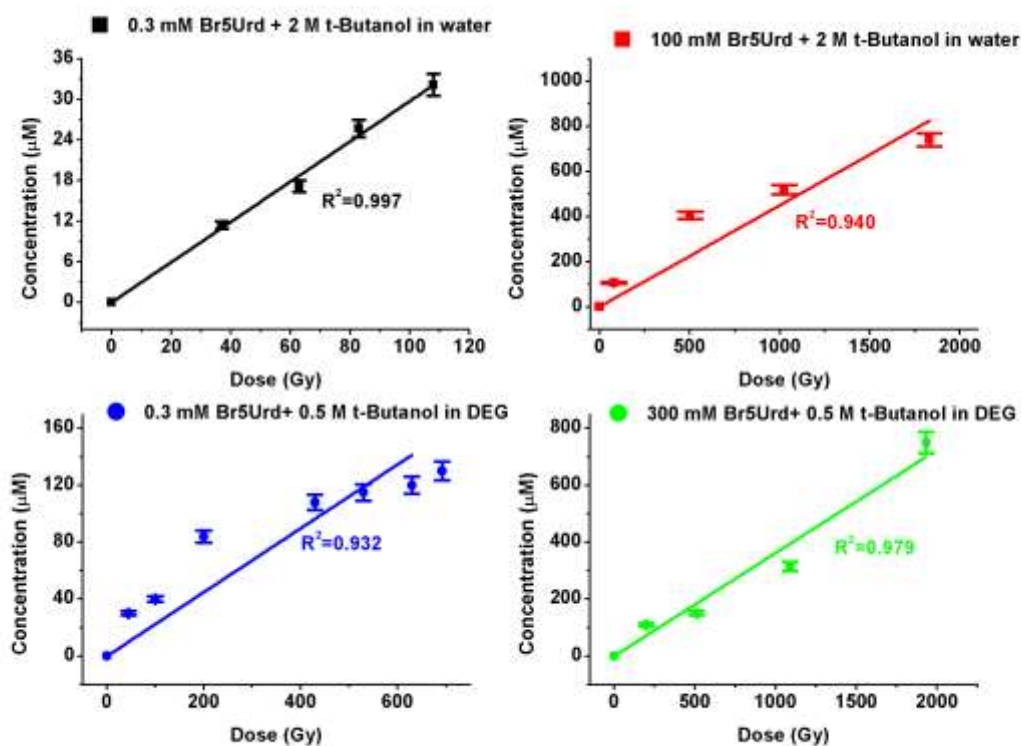

**Figure S1.** Curves showing the concentrations (in  $\mu\text{M}$ ) of gamma-radiation produced  $\text{Br}^-$  in solutions of Br5Urd in DEG and in water as a function of absorbed dose (in Gy) with corresponding linear regression analyses. These curves are used to obtain the G values that are presented in Table 1 of the main manuscript.

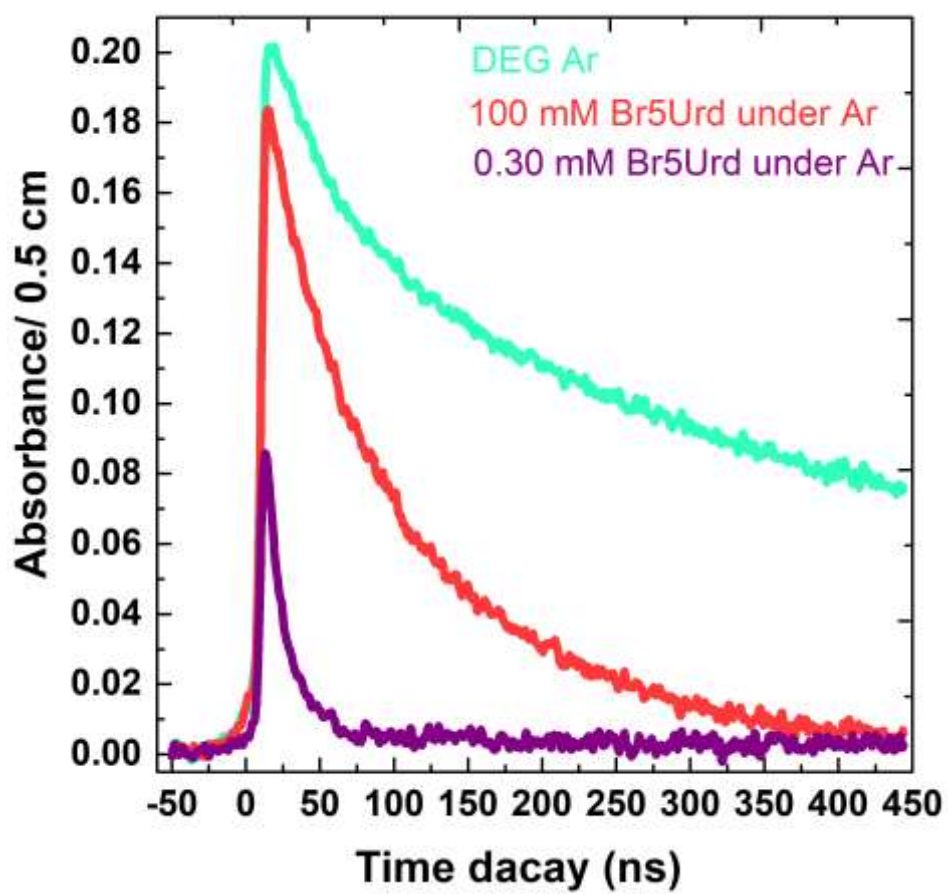

**Figure S2.** Decay of solvated electron in DEG under different conditions.

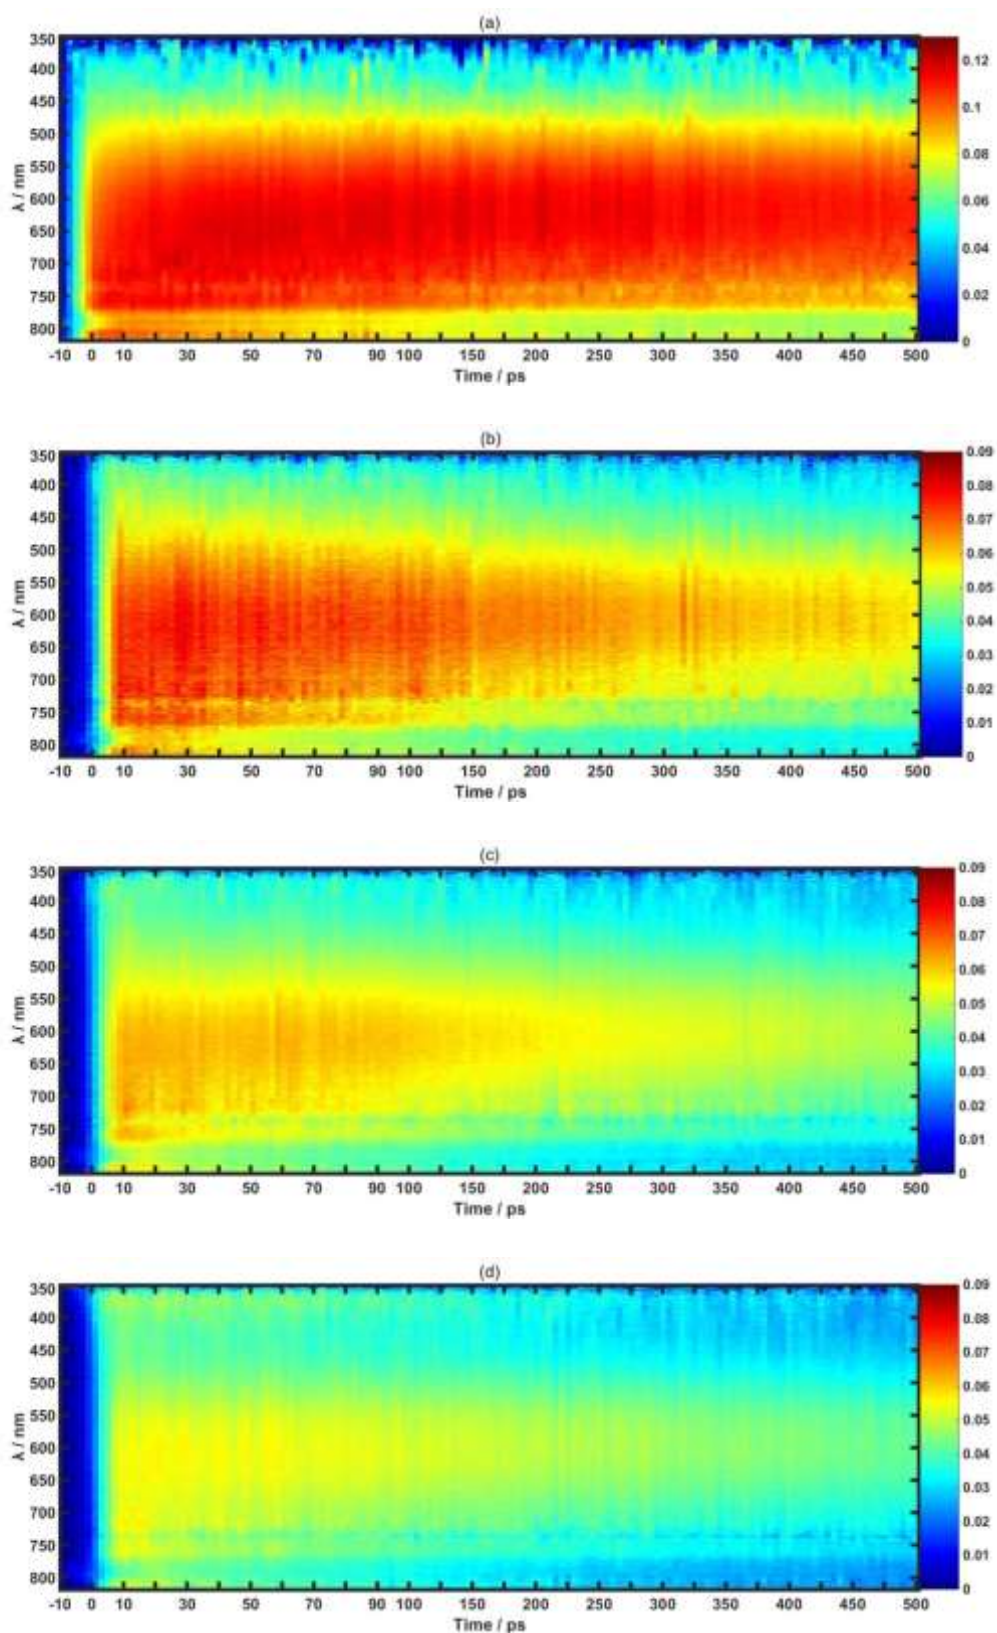

**Figure S3.** Two-dimensional absorption matrix data obtained by picosecond pulse radiolysis of **(a)** diethylene glycol (DEG); **(b)** 0.3 M m5Urd in DEG; **(c)** 0.3 M F5Urd in DEG; **(d)** 0.3 M Br5Urd in DEG.

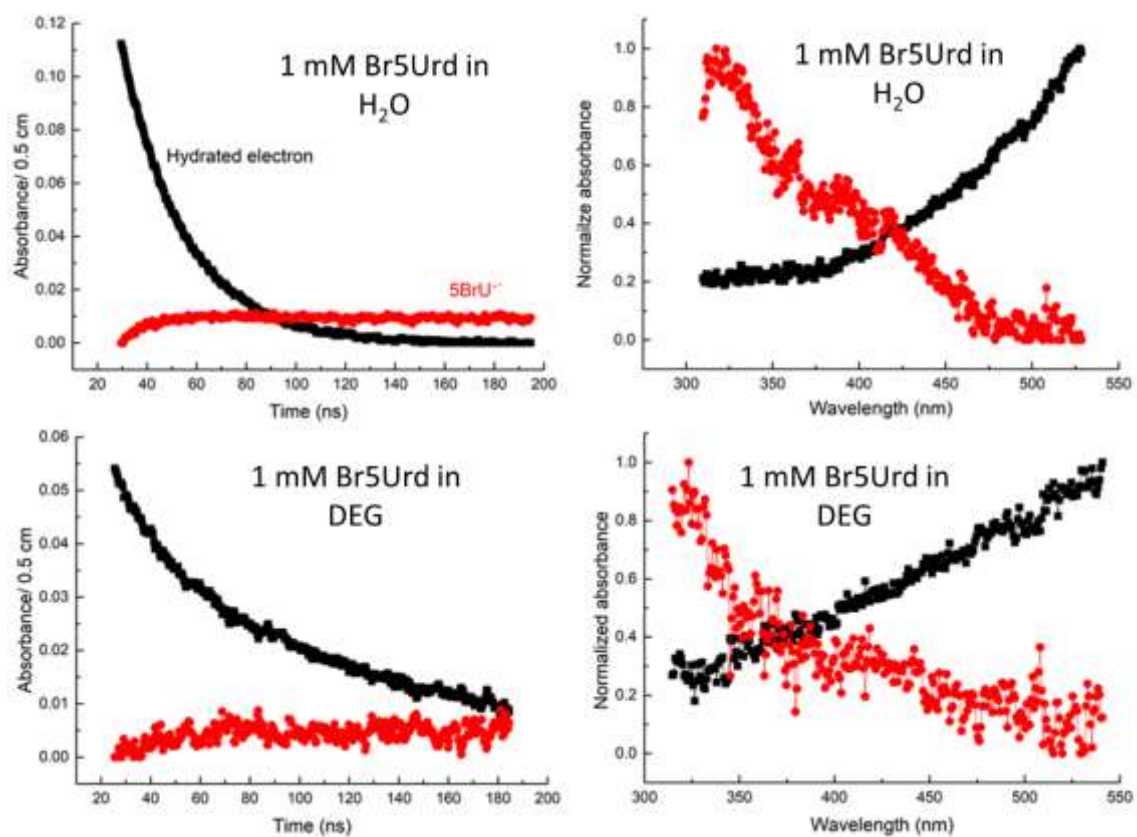

**Figure S4.** Kinetics and the absorption spectra of the solvated electron and the Br5Urd\* in water and in DEG deduced from the Pulse radiolysis of water and DEG solutions containing a 1 mmol/L Br5Urd.

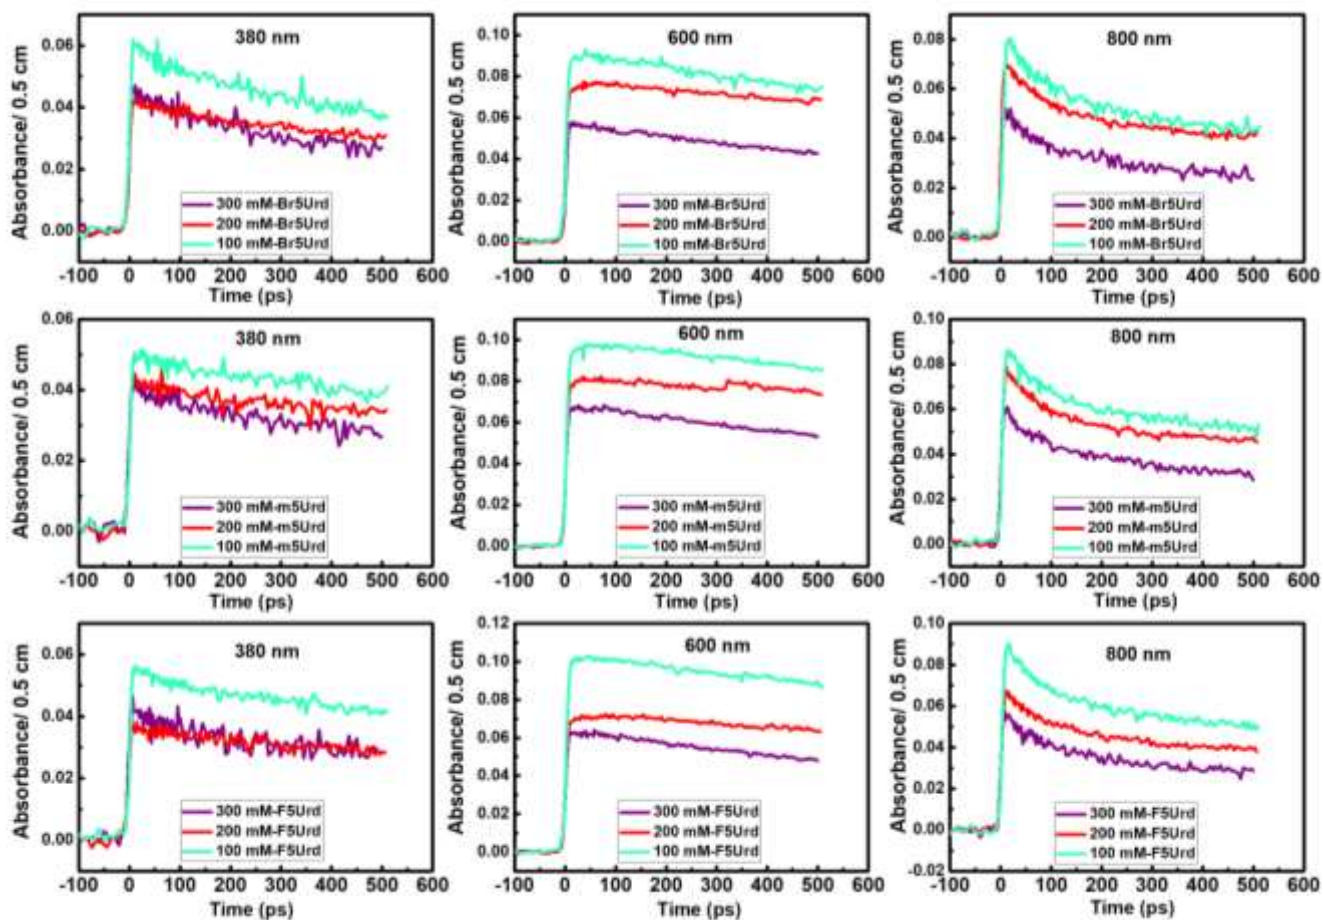

**Figure S5.** The initial yields and kinetics of solvated electrons in solutions of m5Urd, Br5Urd, and F5Urd in DEG at different concentrations.
